# Supplementary material for: Mass Spectrometry-Based System for Identifying and Typing Norovirus Major Capsid Protein VP1
Source: MDPI journal article supplement (doi:10.3390/v13112332), 2021-11-22
Supplement: s1 [file s1]

**Supplementary Table S1: Co-Evolving Pairs of Sites Detected by Bayesian graphical model.**

| Site 1 | Site 2 | P [Site 1 → Site 2] | P [Site 2 → Site 1] | P [Site 1 ↔ Site 2] |
|--------|--------|---------------------|---------------------|---------------------|
| 2      | 100    | 0                   | 0.96                | 0.96                |
| 6      | 540    | 0                   | 0.99                | 0.99                |
| 9      | 138    | 0                   | 1                   | 1                   |
| 10     | 115    | 0.91                | 0                   | 0.91                |
| 11     | 422    | 0.97                | 0                   | 0.97                |
| 12     | 71     | 1                   | 0                   | 1                   |
| 12     | 317    | 0.001               | 0.84                | 0.84                |
| 13     | 14     | 0.43                | 0.57                | 1                   |
| 14     | 223    | 0.92                | 0.02                | 0.94                |
| 14     | 308    | 0.76                | 0                   | 0.76                |
| 15     | 21     | 0                   | 0.96                | 0.96                |
| 15     | 467    | 1                   | 0                   | 1                   |
| 16     | 200    | 0.001               | 0.93                | 0.93                |
| 17     | 305    | 0                   | 0.99                | 0.99                |
| 17     | 316    | 0.99                | 0                   | 0.99                |
| 21     | 224    | 0.98                | 0.009               | 0.99                |
| 21     | 239    | 0.98                | 0.006               | 0.99                |
| 21     | 287    | 0.93                | 0                   | 0.93                |
| 21     | 288    | 0.73                | 0                   | 0.73                |
| 21     | 436    | 0.002               | 0.97                | 0.97                |
| 22     | 437    | 0                   | 0.99                | 0.99                |
| 23     | 362    | 0.01                | 0.99                | 1                   |
| 24     | 27     | 0                   | 1                   | 1                   |
| 25     | 134    | 1                   | 0                   | 1                   |
| 25     | 436    | 1                   | 0                   | 1                   |
| 26     | 155    | 1                   | 0                   | 1                   |
| 26     | 317    | 0                   | 0.99                | 0.99                |
| 26     | 471    | 1                   | 0                   | 1                   |
| 27     | 121    | 0                   | 0.96                | 0.96                |
| 27     | 170    | 0.98                | 0                   | 0.98                |
| 27     | 369    | 0.97                | 0                   | 0.97                |
| 28     | 514    | 0                   | 0.99                | 0.99                |
| 30     | 152    | 0.7                 | 0                   | 0.7                 |
| 33     | 150    | 0                   | 0.94                | 0.94                |
| 35     | 192    | 0.9                 | 0                   | 0.9                 |
| 36     | 368    | 0                   | 0.6                 | 0.6                 |
| 37     | 317    | 0                   | 0.78                | 0.78                |
| 39     | 99     | 0                   | 0.98                | 0.98                |
| 39     | 363    | 1                   | 0                   | 1                   |
| 42     | 329    | 0                   | 0.87                | 0.87                |

| Site 1 | Site 2 | P [Site 1 → Site 2] | P [Site 2 → Site 1] | P [Site 1 ↔ Site 2] |
|--------|--------|---------------------|---------------------|---------------------|
| 45     | 130    | 0                   | 1                   | 1                   |
|        | 164    | 0.96                | 0                   | 0.96                |
|        | 377    | 0.99                | 0                   | 0.99                |
|        | 431    | 0.86                | 0                   | 0.86                |
| 47     | 130    | 0                   | 1                   | 1                   |
|        | 346    | 0.8                 | 0                   | 0.8                 |
|        | 121    | 0                   | 0.98                | 0.98                |
|        | 211    | 0.97                | 0                   | 0.97                |
|        | 314    | 0.62                | 0                   | 0.62                |
|        | 382    | 0.95                | 0                   | 0.95                |
|        | 523    | 1                   | 0                   | 1                   |
|        | 120    | 0.99                | 0.01                | 1                   |
|        | 257    | 0                   | 0.99                | 0.99                |
|        | 315    | 0.54                | 0                   | 0.54                |
|        | 198    | 0                   | 0.94                | 0.94                |
|        | 220    | 0.72                | 0.28                | 1                   |
|        | 214    | 0.88                | 0                   | 0.88                |
|        | 238    | 1                   | 0                   | 1                   |
|        | 295    | 0.82                | 0                   | 0.82                |
|        | 329    | 0                   | 0.57                | 0.57                |
|        | 205    | 0.73                | 0                   | 0.73                |
|        | 106    | 0.079               | 0.92                | 1                   |
|        | 379    | 1                   | 0                   | 1                   |
|        | 255    | 0.99                | 0                   | 0.99                |
|        | 189    | 0.32                | 0.36                | 0.68                |
|        | 487    | 0.33                | 0.28                | 0.61                |
|        | 350    | 0                   | 0.56                | 0.56                |
|        | 305    | 0                   | 0.99                | 0.99                |
|        | 489    | 1                   | 0                   | 1                   |
|        | 80     | 0.57                | 0                   | 0.57                |
|        | 99     | 0.001               | 0.69                | 0.69                |
|        | 130    | 0.59                | 0.081               | 0.68                |
|        | 246    | 0.95                | 0                   | 0.95                |
|        | 493    | 1                   | 0                   | 1                   |
|        | 177    | 0.88                | 0.12                | 1                   |
|        | 397    | 0.83                | 0.01                | 0.84                |
|        | 139    | 0.47                | 0.51                | 0.98                |
|        | 156    | 0.99                | 0                   | 0.99                |
|        | 335    | 0                   | 0.92                | 0.92                |
|        | 537    | 0.36                | 0.41                | 0.77                |
|        | 271    | 0                   | 1                   | 1                   |
|        | 150    | 0.001               | 0.51                | 0.52                |

| Site 1 | Site 2 | P [Site 1 → Site 2] | P [Site 2 → Site 1] | P [Site 1 ↔ Site 2] |
|--------|--------|---------------------|---------------------|---------------------|
| 94     | 457    | 0                   | 0.95                | 0.95                |
| 98     | 181    | 0.87                | 0.015               | 0.89                |
| 98     | 260    | 0.82                | 0                   | 0.82                |
| 98     | 403    | 0                   | 0.9                 | 0.9                 |
| 99     | 518    | 1                   | 0                   | 1                   |
| 100    | 312    | 0.94                | 0                   | 0.94                |
| 103    | 249    | 0                   | 0.97                | 0.97                |
| 104    | 193    | 1                   | 0                   | 1                   |
| 104    | 528    | 0                   | 0.86                | 0.86                |
| 106    | 402    | 0                   | 0.78                | 0.78                |
| 107    | 355    | 0                   | 0.91                | 0.91                |
| 108    | 273    | 0.6                 | 0                   | 0.6                 |
| 108    | 494    | 0.9                 | 0                   | 0.9                 |
| 108    | 501    | 0                   | 1                   | 1                   |
| 119    | 155    | 0                   | 0.95                | 0.95                |
| 120    | 178    | 0.58                | 0                   | 0.58                |
| 121    | 195    | 0.99                | 0                   | 0.99                |
| 121    | 236    | 0.55                | 0                   | 0.55                |
| 121    | 492    | 0.64                | 0.32                | 0.96                |
| 122    | 129    | 0                   | 0.62                | 0.62                |
| 124    | 382    | 0                   | 0.75                | 0.75                |
| 127    | 155    | 0                   | 1                   | 1                   |
| 127    | 311    | 0.73                | 0                   | 0.73                |
| 129    | 415    | 0.96                | 0.008               | 0.97                |
| 130    | 179    | 0.83                | 0                   | 0.83                |
| 130    | 213    | 0.94                | 0                   | 0.94                |
| 130    | 327    | 0.81                | 0                   | 0.81                |
| 130    | 417    | 1                   | 0                   | 1                   |
| 131    | 499    | 0.95                | 0                   | 0.95                |
| 132    | 144    | 1                   | 0                   | 1                   |
| 132    | 305    | 0                   | 0.98                | 0.98                |
| 135    | 457    | 0                   | 0.94                | 0.94                |
| 136    | 155    | 0                   | 1                   | 1                   |
| 136    | 373    | 0.79                | 0                   | 0.79                |
| 137    | 451    | 0.26                | 0.3                 | 0.56                |
| 138    | 416    | 0.99                | 0                   | 0.99                |
| 138    | 540    | 0                   | 1                   | 1                   |
| 140    | 225    | 0                   | 1                   | 1                   |
| 141    | 279    | 0                   | 1                   | 1                   |
| 141    | 324    | 0.98                | 0                   | 0.98                |
| 141    | 519    | 0.79                | 0                   | 0.79                |
| 145    | 239    | 0.005               | 0.98                | 0.99                |

| Site 1 | Site 2 | P [Site 1 → Site 2] | P [Site 2 → Site 1] | P [Site 1 ↔ Site 2] |
|--------|--------|---------------------|---------------------|---------------------|
| 146    | 352    | 0                   | 0.87                | 0.87                |
| 150    | 173    | 0                   | 0.9                 | 0.9                 |
| 155    | 171    | 0.96                | 0                   | 0.96                |
| 155    | 235    | 1                   | 0                   | 1                   |
| 155    | 248    | 1                   | 0                   | 1                   |
| 155    | 298    | 1                   | 0                   | 1                   |
| 155    | 352    | 1                   | 0                   | 1                   |
| 155    | 354    | 0.83                | 0                   | 0.83                |
| 155    | 376    | 1                   | 0                   | 1                   |
| 155    | 389    | 1                   | 0                   | 1                   |
| 161    | 320    | 0.72                | 0                   | 0.72                |
| 161    | 519    | 0.19                | 0.81                | 1                   |
| 163    | 202    | 1                   | 0                   | 1                   |
| 163    | 403    | 0.92                | 0.016               | 0.93                |
| 163    | 464    | 0                   | 0.98                | 0.98                |
| 163    | 480    | 0.77                | 0                   | 0.77                |
| 164    | 502    | 0.92                | 0                   | 0.92                |
| 165    | 323    | 0.89                | 0                   | 0.89                |
| 165    | 533    | 0                   | 0.93                | 0.93                |
| 166    | 337    | 0                   | 0.99                | 0.99                |
| 168    | 348    | 0                   | 0.87                | 0.87                |
| 169    | 267    | 0.37                | 0.21                | 0.58                |
| 173    | 341    | 0.72                | 0                   | 0.72                |
| 173    | 437    | 0                   | 0.59                | 0.59                |
| 174    | 250    | 0                   | 0.81                | 0.81                |
| 175    | 317    | 0                   | 0.59                | 0.59                |
| 176    | 319    | 1                   | 0                   | 1                   |
| 176    | 449    | 0                   | 0.92                | 0.92                |
| 180    | 284    | 0.74                | 0                   | 0.74                |
| 180    | 492    | 0                   | 0.64                | 0.64                |
| 188    | 411    | 0.82                | 0                   | 0.82                |
| 188    | 412    | 0.73                | 0                   | 0.73                |
| 188    | 526    | 0                   | 0.88                | 0.88                |
| 189    | 487    | 0.42                | 0.27                | 0.68                |
| 190    | 493    | 0.002               | 0.97                | 0.97                |
| 191    | 255    | 0                   | 0.71                | 0.71                |
| 191    | 268    | 0.68                | 0                   | 0.68                |
| 195    | 232    | 0.57                | 0                   | 0.57                |
| 195    | 443    | 0.53                | 0                   | 0.53                |
| 195    | 462    | 0.52                | 0                   | 0.52                |
| 198    | 422    | 0                   | 0.51                | 0.51                |
| 199    | 427    | 0.29                | 0.32                | 0.61                |

| Site 1 | Site 2 | P [Site 1 → Site 2] | P [Site 2 → Site 1] | P [Site 1 ↔ Site 2] |
|--------|--------|---------------------|---------------------|---------------------|
| 199    | 476    | 0.19                | 0.48                | 0.67                |
| 200    | 277    | 0.99                | 0                   | 0.99                |
| 200    | 492    | 0                   | 0.71                | 0.71                |
| 203    | 491    | 0.003               | 0.76                | 0.76                |
| 207    | 369    | 0                   | 0.99                | 0.99                |
| 208    | 443    | 0                   | 0.54                | 0.54                |
| 213    | 470    | 0.91                | 0                   | 0.91                |
| 216    | 480    | 0                   | 1                   | 1                   |
| 219    | 369    | 0                   | 0.51                | 0.51                |
| 226    | 530    | 0                   | 0.55                | 0.55                |
| 227    | 452    | 0                   | 0.96                | 0.96                |
| 228    | 343    | 0                   | 1                   | 1                   |
| 229    | 489    | 0                   | 0.86                | 0.86                |
| 233    | 321    | 0.98                | 0                   | 0.98                |
| 233    | 530    | 0.086               | 0.91                | 0.99                |
| 234    | 357    | 0                   | 0.97                | 0.97                |
| 236    | 332    | 0.51                | 0.007               | 0.52                |
| 237    | 293    | 0                   | 0.98                | 0.98                |
| 244    | 305    | 0                   | 0.99                | 0.99                |
| 245    | 469    | 0                   | 1                   | 1                   |
| 247    | 305    | 0.19                | 0.61                | 0.8                 |
| 247    | 509    | 0.38                | 0.14                | 0.52                |
| 248    | 496    | 0.6                 | 0                   | 0.6                 |
| 249    | 257    | 0.01                | 0.99                | 1                   |
| 251    | 336    | 0.36                | 0.62                | 0.98                |
| 252    | 329    | 0                   | 1                   | 1                   |
| 253    | 313    | 0                   | 0.68                | 0.68                |
| 254    | 493    | 0                   | 0.96                | 0.96                |
| 256    | 289    | 0.79                | 0                   | 0.79                |
| 256    | 366    | 1                   | 0                   | 1                   |
| 256    | 404    | 0.68                | 0                   | 0.68                |
| 256    | 437    | 0.011               | 0.81                | 0.83                |
| 257    | 261    | 0                   | 0.65                | 0.65                |
| 257    | 310    | 1                   | 0                   | 1                   |
| 257    | 505    | 1                   | 0                   | 1                   |
| 258    | 285    | 0                   | 1                   | 1                   |
| 260    | 455    | 0.44                | 0.17                | 0.61                |
| 261    | 329    | 0                   | 1                   | 1                   |
| 266    | 365    | 0                   | 0.94                | 0.94                |
| 271    | 400    | 0.99                | 0                   | 0.99                |
| 271    | 534    | 0.97                | 0.03                | 1                   |
| 271    | 540    | 0.09                | 0.79                | 0.88                |

| Site 1 | Site 2 | P [Site 1 → Site 2] | P [Site 2 → Site 1] | P [Site 1 ↔ Site 2] |
|--------|--------|---------------------|---------------------|---------------------|
| 272    | 428    | 0.23                | 0.75                | 0.98                |
| 278    | 514    | 1                   | 0                   | 1                   |
| 279    | 329    | 0                   | 1                   | 1                   |
| 280    | 381    | 0                   | 0.6                 | 0.6                 |
| 281    | 448    | 0                   | 0.99                | 0.99                |
| 282    | 441    | 0                   | 0.78                | 0.78                |
| 285    | 317    | 0                   | 0.95                | 0.95                |
| 286    | 391    | 0                   | 0.54                | 0.54                |
| 288    | 466    | 0.89                | 0.11                | 1                   |
| 289    | 329    | 0.35                | 0.18                | 0.53                |
| 290    | 366    | 0                   | 0.5                 | 0.5                 |
| 291    | 446    | 0                   | 0.7                 | 0.7                 |
| 292    | 438    | 0                   | 1                   | 1                   |
| 293    | 329    | 0                   | 0.75                | 0.75                |
| 294    | 388    | 0                   | 1                   | 1                   |
| 297    | 437    | 0.43                | 0.53                | 0.97                |
| 298    | 445    | 0.72                | 0.001               | 0.72                |
| 299    | 465    | 0                   | 1                   | 1                   |
| 300    | 507    | 0                   | 0.89                | 0.89                |
| 301    | 381    | 0                   | 1                   | 1                   |
| 301    | 501    | 0.93                | 0                   | 0.93                |
| 302    | 475    | 0                   | 0.83                | 0.83                |
| 303    | 388    | 0                   | 0.94                | 0.94                |
| 304    | 438    | 0                   | 0.98                | 0.98                |
| 305    | 330    | 0.88                | 0                   | 0.88                |
| 305    | 331    | 0.99                | 0                   | 0.99                |
| 305    | 335    | 0.99                | 0                   | 0.99                |
| 305    | 337    | 0.99                | 0.01                | 1                   |
| 305    | 380    | 0.99                | 0                   | 0.99                |
| 305    | 399    | 0.98                | 0                   | 0.98                |
| 305    | 442    | 0.99                | 0                   | 0.99                |
| 305    | 459    | 0.99                | 0                   | 0.99                |
| 305    | 540    | 0                   | 0.79                | 0.79                |
| 306    | 330    | 0                   | 0.75                | 0.75                |
| 307    | 511    | 0                   | 0.86                | 0.86                |
| 309    | 413    | 0.015               | 0.95                | 0.97                |
| 313    | 328    | 1                   | 0                   | 1                   |
| 313    | 385    | 0.77                | 0                   | 0.77                |
| 313    | 402    | 0                   | 0.54                | 0.54                |
| 313    | 483    | 0.92                | 0                   | 0.92                |
| 317    | 357    | 0.56                | 0                   | 0.56                |
| 317    | 398    | 0.72                | 0                   | 0.72                |

| Site 1 | Site 2 | P [Site 1 → Site 2] | P [Site 2 → Site 1] | P [Site 1 ↔ Site 2] |
|--------|--------|---------------------|---------------------|---------------------|
| 317    | 409    | 1                   | 0                   | 1                   |
| 317    | 414    | 0.99                | 0                   | 0.99                |
| 317    | 468    | 0.99                | 0                   | 0.99                |
| 317    | 475    | 0                   | 1                   | 1                   |
| 324    | 486    | 0.98                | 0.003               | 0.98                |
| 329    | 358    | 0.66                | 0                   | 0.66                |
| 329    | 372    | 1                   | 0                   | 1                   |
| 329    | 388    | 1                   | 0                   | 1                   |
| 329    | 392    | 0.9                 | 0                   | 0.9                 |
| 329    | 393    | 1                   | 0                   | 1                   |
| 329    | 445    | 0                   | 0.64                | 0.64                |
| 332    | 383    | 0.47                | 0.26                | 0.73                |
| 332    | 516    | 0.39                | 0.23                | 0.62                |
| 333    | 512    | 0.63                | 0                   | 0.63                |
| 333    | 540    | 0                   | 1                   | 1                   |
| 334    | 348    | 0                   | 0.89                | 0.89                |
| 336    | 430    | 0.54                | 0                   | 0.54                |
| 336    | 457    | 0.52                | 0                   | 0.52                |
| 337    | 370    | 0.88                | 0                   | 0.88                |
| 338    | 370    | 0                   | 0.54                | 0.54                |
| 339    | 377    | 0                   | 0.62                | 0.62                |
| 340    | 377    | 0                   | 0.98                | 0.98                |
| 341    | 453    | 0.83                | 0                   | 0.83                |
| 343    | 526    | 0                   | 0.99                | 0.99                |
| 344    | 370    | 0                   | 0.67                | 0.67                |
| 344    | 375    | 0.67                | 0.33                | 1                   |
| 345    | 347    | 1                   | 0                   | 1                   |
| 345    | 459    | 0                   | 1                   | 1                   |
| 348    | 370    | 0.06                | 0.94                | 1                   |
| 348    | 441    | 0.87                | 0.06                | 0.93                |
| 350    | 368    | 0                   | 1                   | 1                   |
| 351    | 475    | 0                   | 1                   | 1                   |
| 353    | 423    | 0                   | 0.98                | 0.98                |
| 355    | 357    | 0                   | 0.99                | 0.99                |
| 356    | 401    | 0.54                | 0                   | 0.54                |
| 356    | 437    | 0                   | 1                   | 1                   |
| 356    | 504    | 1                   | 0                   | 1                   |
| 361    | 384    | 0.55                | 0.001               | 0.55                |
| 361    | 463    | 0.6                 | 0.39                | 0.99                |
| 361    | 540    | 0.19                | 0.35                | 0.54                |
| 362    | 403    | 0.001               | 0.86                | 0.86                |
| 363    | 428    | 0.61                | 0.002               | 0.61                |

| Site 1 | Site 2 | P [Site 1 → Site 2] | P [Site 2 → Site 1] | P [Site 1 ↔ Site 2] |
|--------|--------|---------------------|---------------------|---------------------|
| 364    | 445    | 0                   | 0.57                | 0.57                |
| 367    | 369    | 0                   | 0.99                | 0.99                |
| 368    | 445    | 0.28                | 0.7                 | 0.98                |
| 369    | 446    | 1                   | 0                   | 1                   |
| 370    | 371    | 1                   | 0                   | 1                   |
| 372    | 478    | 1                   | 0                   | 1                   |
| 375    | 391    | 1                   | 0                   | 1                   |
| 376    | 444    | 0.94                | 0                   | 0.94                |
| 378    | 465    | 0                   | 1                   | 1                   |
| 381    | 430    | 0                   | 0.73                | 0.73                |
| 381    | 485    | 0.98                | 0                   | 0.98                |
| 383    | 516    | 0.29                | 0.34                | 0.64                |
| 386    | 457    | 0                   | 1                   | 1                   |
| 387    | 472    | 0                   | 0.91                | 0.91                |
| 389    | 390    | 0.98                | 0                   | 0.98                |
| 402    | 435    | 0.021               | 0.61                | 0.64                |
| 403    | 525    | 0.86                | 0                   | 0.86                |
| 407    | 437    | 0                   | 0.81                | 0.81                |
| 412    | 506    | 1                   | 0                   | 1                   |
| 413    | 465    | 0                   | 0.99                | 0.99                |
| 421    | 440    | 0                   | 0.93                | 0.93                |
| 422    | 452    | 0.61                | 0.029               | 0.64                |
| 425    | 475    | 0                   | 1                   | 1                   |
| 426    | 462    | 0.12                | 0.82                | 0.95                |
| 427    | 476    | 0.32                | 0.4                 | 0.72                |
| 430    | 469    | 0.83                | 0                   | 0.83                |
| 430    | 503    | 1                   | 0                   | 1                   |
| 435    | 450    | 0.69                | 0.31                | 1                   |
| 435    | 528    | 0.59                | 0                   | 0.59                |
| 438    | 526    | 0                   | 0.96                | 0.96                |
| 439    | 473    | 0.048               | 0.45                | 0.5                 |
| 439    | 517    | 0.016               | 0.51                | 0.53                |
| 440    | 458    | 0.99                | 0                   | 0.99                |
| 440    | 507    | 0                   | 0.99                | 0.99                |
| 449    | 493    | 0                   | 0.95                | 0.95                |
| 457    | 464    | 0.88                | 0                   | 0.88                |
| 465    | 509    | 0.079               | 0.79                | 0.87                |
| 473    | 517    | 0.53                | 0.43                | 0.97                |
| 475    | 497    | 0.97                | 0                   | 0.97                |
| 475    | 507    | 0.9                 | 0                   | 0.9                 |
| 475    | 526    | 0.03                | 0.97                | 1                   |
| 481    | 512    | 0                   | 0.55                | 0.55                |



| Site 1 | Site 2 | P [Site 1 → Site 2] | P [Site 2 → Site 1] | P [Site 1 ↔ Site 2] |
|--------|--------|---------------------|---------------------|---------------------|
| 492    | 522    | 0.92                | 0                   | 0.92                |
| 495    | 515    | 0.46                | 0.29                | 0.75                |
| 500    | 533    | 0                   | 0.91                | 0.91                |
| 508    | 523    | 0                   | 0.84                | 0.84                |
| 509    | 530    | 0.52                | 0.47                | 0.99                |
| 526    | 540    | 0                   | 0.65                | 0.65                |
| 535    | 536    | 0.46                | 0.54                | 1                   |
| 539    | 540    | 0                   | 0.98                | 0.98                |

Columns site 1 and site 2 show the sites determined to have at least one co-evolutionary interaction. Protein regions: N-terminus arm (a.a. 1-45) colored in light orange; shell domain (a.a. 46-215) in light grey; hinge region (a.a. 216-226) in light green; P1-1 (a.a. 227-273) and P1-2 subdomain (a.a. 416-5840) in light and darker blue; P2 subdomain (a.a. 247-415) in light purple. Column P [Site 1 → Site 2], P [Site 2 → Site 1], and P [Site 1 ↔ Site 2] shows the posterior probability (PP) value of site 1 and site 2 influence with each other, the arrow between site 1 and site 2 indicates the influence direction. The background colored gradient by posterior probability values. This coevolution analysis was analyzed by the spidermonkey/BGM implemented in datamonkey website (<http://www.datamonkey.org/bgm>).
